# Supplementary material
Source: Springer Nature journal article supplement (https://www.springermedizin.de/resource/supplementary/12970_2007_47_MOESM3_ESM.pdf/9594242)

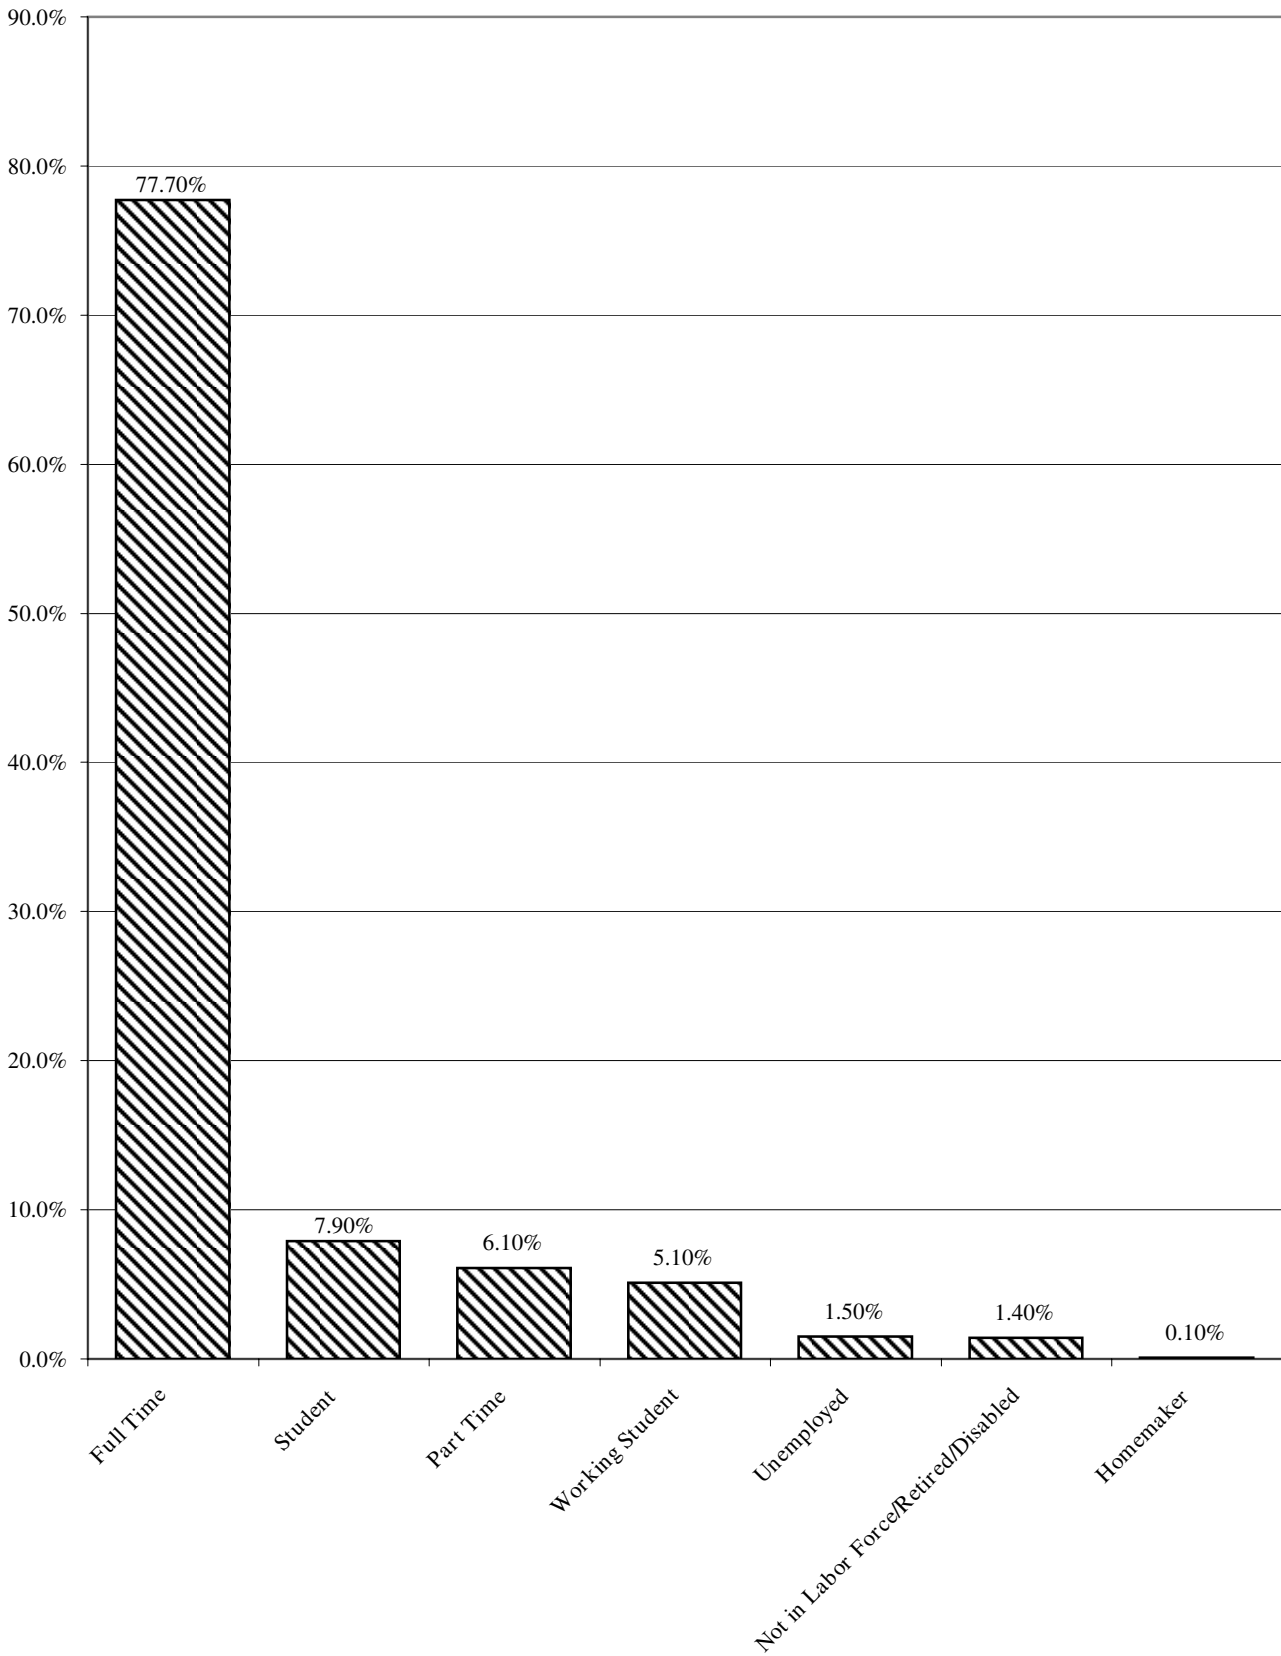

Supplement: MOESM3 [file 9594242]
